# Supplementary material
Source: publisher figshare collection journal article supplement (https://sage.figshare.com/ndownloader/files/16587890)
Supplement: Supplementary file 1 [file 16587890]

## Notation

|                                                         |                                                                                       |
|---------------------------------------------------------|---------------------------------------------------------------------------------------|
| $\mathbf{M}_v, \mathbf{K}_v, \mathbf{C}_v$              | Mass, stiffness and damping matrices of the vehicle                                   |
| $\mathbf{X}_v, \dot{\mathbf{X}}_v, \ddot{\mathbf{X}}_v$ | Displacement, velocity and acceleration vectors of the vehicle                        |
| $\mathbf{F}_{vt}$                                       | Load vector acting on the vehicle                                                     |
| $\mathbf{F}_{vt}^s$                                     | Load vector acting on the vehicle running on straight track                           |
| $\mathbf{F}_c^s$                                        | Sub-load vector acting on car body on straight track                                  |
| $\mathbf{F}_{t_i}^s (i = 1 \sim 2)$                     | Sub-load vector acting on frames 1~2 on straight track                                |
| $\mathbf{F}_{w_i}^s (i = 1 \sim 4)$                     | Sub-load vector acting on wheelsets 1~4 on straight track                             |
| $\mathbf{F}_{vt}^c$                                     | Load vector acting on vehicle caused by geometry parameters of curved track           |
| $\mathbf{F}_c^c$                                        | Sub-load vector acting on the car body caused by geometry parameters of curved track  |
| $\mathbf{F}_{t_i}^c (i = 1 \sim 2)$                     | Sub-load vector acting on frames 1~2 caused by geometry parameters of curved track    |
| $\mathbf{F}_{w_i}^c (i = 1 \sim 4)$                     | Sub-load vector acting on wheelsets 1~4 caused by geometry parameters of curved track |
| $\mathbf{M}_t, \mathbf{K}_t, \mathbf{C}_t$              | Mass, stiffness and damping matrices of the track                                     |
| $\mathbf{X}_t, \dot{\mathbf{X}}_t, \ddot{\mathbf{X}}_t$ | Displacement, velocity and acceleration vectors of the track                          |
| $\mathbf{F}_{tv}$                                       | Load vector acting on the track                                                       |
| $\mathbf{F}_r^L, \mathbf{F}_r^R, \mathbf{F}_s$          | Sub-load vectors acting on the left rail, right rail and sleeper                      |
| $\mathbf{a}_n$                                          | Prediction coefficient vector                                                         |
| $\bar{\mathbf{F}}_n$                                    | Past forces vector                                                                    |
| $\mathbf{C}$                                            | Covariance matrix                                                                     |
| $\tilde{\mathbf{C}}$                                    | Approximated covariance matrix by KL expansion                                        |

|                                                      |                                                                                          |
|------------------------------------------------------|------------------------------------------------------------------------------------------|
| $\Lambda, \Phi$                                      | Eigenvalue and eigenvectors matrices                                                     |
| $x, y, z$                                            | Longitudinal, Lateral, vertical components along absolute coordinate system              |
| $\alpha = L, R$                                      | Left and right side of the vehicle or track                                              |
| $F_{ix}^\alpha, F_{iy}^\alpha, F_{iz}^\alpha$        | Longitudinal, lateral and vertical forces acting on the $i$ th wheelset                  |
| $r_{wi}^\alpha$                                      | Instant rolling radius of the wheels of the $i$ th wheelset                              |
| $d_0$                                                | Half of the lateral distance between wheel-rail nominal contact points                   |
| $m_0$                                                | Vehicle mass                                                                             |
| $\psi_{wi}$                                          | Yaw angle of the $i$ th wheelset                                                         |
| $g$                                                  | Gravity acceleration                                                                     |
| $V$                                                  | Running speed                                                                            |
| $m_c$                                                | Car body mass                                                                            |
| $r_0$                                                | Wheel nominal radius                                                                     |
| $h_{tw}$                                             | Height of frame's centre of gravity (COG) above wheelset's COG                           |
| $h_{bt}$                                             | Height of secondary suspension centre above frame's COG                                  |
| $h_{cb}$                                             | Height of car body's COG above secondary suspension centre                               |
| $R_c$                                                | Curvature radius of the track at the location of car body's COG                          |
| $I_{cx}, I_{cz}$                                     | Roll and yaw moments of inertia of car body                                              |
| $I_{tx}, I_{tz}$                                     | Roll and yaw moments of inertia of frame                                                 |
| $R_{ti}$                                             | Curvature radius of the track at the location of the $i$ th frame's COG                  |
| $\phi_{sec}, \ddot{\phi}_{sec}$                      | Superelevation angle and its second derivative at the location of car body's COG         |
| $\phi_{seti}, \ddot{\phi}_{seti}$                    | Superelevation angle and its second derivative at the location of the $i$ th frame's COG |
| $m_w$                                                | Wheelset mass                                                                            |
| $I_{wx}, I_{wy}, I_{wz}$                             | Roll, pitch and yaw moment of inertia of wheelset                                        |
| $\phi_{sewi}, \dot{\phi}_{sewi}, \ddot{\phi}_{sewi}$ | Superelevation angle and its first derivative, second derivative at the location of the  |

|                          |                                                                              |
|--------------------------|------------------------------------------------------------------------------|
| $\ddot{\phi}_{sewi}$     | $i$ th wheelset's COG                                                        |
| $R_{wi}$                 | Curvature radius of the track at the location of the $i$ th wheelset's COG   |
| $\dot{\beta}_{wi}$       | Angular velocity of the $i$ th wheelset in pitch direction                   |
| $k_{px}, k_{py}, k_{pz}$ | Longitudinal, lateral, vertical stiffness of primary suspension              |
| $c_{px}, c_{py}, c_{pz}$ | Longitudinal, lateral, vertical damping coefficients of primary suspension   |
| $k_{sx}, k_{sy}, k_{sz}$ | Longitudinal, lateral, vertical stiffness of secondary suspension            |
| $c_{sx}, c_{sy}, c_{sz}$ | Longitudinal, lateral, vertical damping coefficients of secondary suspension |
| $d_w$                    | Half of the lateral distance between primary suspensions                     |
| $d_s$                    | Half of the lateral distance between secondary suspensions                   |
| $l_t$                    | Half of wheelbase                                                            |
| $l_c$                    | Half of the distance between bogie centres                                   |
| $Y_k, Z_k, \Phi_k$       | $k$ th mode shape functions of rail's lateral, vertical bending and torsion  |
| $N_w$                    | Number of wheelsets                                                          |
| $x_{wi}$                 | Longitudinal coordinate of the $i$ th wheelset                               |
| $K$                      | Number of modes considered for the rail beam                                 |
| $M_{wi}^\alpha$          | Equivalent moment acting on rails from the $i$ th wheelset                   |
| $P$                      | Prediction order                                                             |
| $a_{n-\vartheta}$        | Prediction coefficient                                                       |
| $f_{wr}$                 | Wheel-rail coefficient of friction                                           |
| $\lambda_n, \phi_n$      | Eigenvalues and normalized eigenvectors of covariance matrix                 |
| $C_0$                    | Variance of the random field of wheel or rail profiles                       |
| $x_i, x_j$               | Coordinates of two discrete points of wheel or rail profiles                 |
| $l$                      | Correlation length                                                           |
| $e_r$                    | Relative error                                                               |

|              |                                                                       |
|--------------|-----------------------------------------------------------------------|
| $b$          | Limit value                                                           |
| $m$          | Number of levels of SS                                                |
| $N$          | Number of samples at each level of SS                                 |
| $P_F$        | Failure probability                                                   |
| $P_j$        | Conditional failure probability                                       |
| $p_0$        | Level probability                                                     |
| $N_T$        | Total number of samples                                               |
| $W$          | Ride index                                                            |
| $f$          | Vibration frequency in Hz                                             |
| $\Delta t$   | Time step                                                             |
| $S$          | Travel distance                                                       |
| $\eta$       | Distribution parameter, such as mean value or variance                |
| $\bar{\eta}$ | Value of distribution parameter where partial derivative is evaluated |
| $e_\eta$     | Normalized sensitivity                                                |

---
